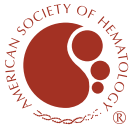

## Targeting inflammation in lower-risk MDS

Jesus D. Gonzalez-Lugo and Amit Verma

Division of Hemato-Oncology, Department of Oncology, Montefiore-Einstein Cancer Center, Blood Cancer Institute, Bronx, NY

The myelodysplastic syndromes (MDS) are a heterogeneous group of malignant hematopoietic stem cell disorders characterized by ineffective growth and differentiation of hematopoietic progenitors leading to peripheral blood cytopenias, dysplasia, and a variable risk of transformation to acute myelogenous leukemia. As most patients present with lower-risk disease, understanding the pathogenesis of ineffective hematopoiesis is important for developing therapies that will increase blood counts in patients with MDS. Various inflammatory cytokines are elevated in MDS and contribute to dysplastic differentiation. Inflammatory pathways mediated by interleukin (IL) 1b, IL-6, IL-1RAP, IL-8, and others lead to growth of aberrant MDS stem and progenitors while inhibiting healthy hematopoiesis. Spliceosome mutations can lead to missplicing of genes such as *IRAK4*, *CASP8*, and *MAP3K*, which lead to activation of proinflammatory nuclear factor  $\kappa$ B-driven pathways. Therapeutically, targeting of ligands of the transforming growth factor  $\beta$  (TGF- $\beta$ ) pathway has led to approval of luspatercept in transfusion-dependent patients with MDS. Presently, various clinical trials are evaluating inhibitors of cytokines and their receptors in low-risk MDS. Taken together, an inflammatory microenvironment can support the pathogenesis of clonal hematopoiesis and low-risk MDS, and clinical trials are evaluating anti-inflammatory strategies in these diseases.

### LEARNING OBJECTIVES

- Discuss the pathologic inflammatory pathways in myelodysplastic syndromes (MDS) and their current therapeutic targeting strategies
- Discuss the role of the transforming growth factor  $\beta$  pathway in MDS and efficacy of luspatercept in transfusion-dependent refractory anemia with ring sideroblasts
- Discuss the most common pathologic spliceosome mutations in MDS that can lead to inflammation and ongoing clinical trials

### CLINICAL CASE 1

A 65-year-old man with a history of hypertension and gout presented to the hematology clinic after routine bloodwork revealed anemia. A complete blood count (CBC) revealed a white blood cell (WBC) count of  $4.5 \times 10^9/\mu\text{L}$ , with an absolute neutrophil count (ANC) of  $2.5 \times 10^9/\mu\text{L}$ , hemoglobin (Hgb) of  $6.2 \text{ g}/\mu\text{L}$ , and platelet count of  $150 \text{ K}/\mu\text{L}$ . B12, folate, iron, and copper levels were normal, and his erythropoietin level was  $635 \text{ mU}/\text{mL}$ . A bone marrow (BM) biopsy was performed, showing a hypercellular marrow (60%-70% cellularity), with marked dysplastic changes in 25% of erythroid cells, 2% of blasts, and 20% of ringed sideroblasts (RSs) by iron staining; cytogenetics was normal. Next-generation sequencing (NGS) revealed *SF3B1 K700E* mutation with 25% variant allele frequency (VAF). The patient was diagnosed with low-risk myelodysplastic syndrome (MDS) with RS and single-lineage dysplasia and

started therapy with subcutaneous luspatercept  $1 \text{ mg}/\text{kg}$  every 3 weeks with transfusion support as needed. His Hgb steadily increased to  $9.6 \text{ g}/\mu\text{L}$  by the fifth dose of luspatercept and he became transfusion independent.

### Introduction

MDS are a heterogeneous group of malignant hematopoietic stem cell disorders characterized by ineffective growth and differentiation of hematopoietic progenitors leading to peripheral blood cytopenias, dysplasia, and a variable risk of transformation to acute myelogenous leukemia. Cytopenias are the commonest presenting symptoms, and most patients have lower-risk disease. Thus, understanding the pathogenesis of ineffective hematopoiesis is important for developing therapies that will benefit most patients with MDS.

Recent experimental evidence has shown that MDS can arise from disease-initiating stem and progenitors that are

enriched in mutations and cytogenetic alterations.<sup>1-5</sup> Emerging data demonstrate that inflammation can lead to selective outgrowth of aberrant stem cells while inhibiting healthy hematopoiesis, resulting in worsening of cytopenias in MDS.<sup>6-9</sup> As MDS is a highly heterogeneous disease, numerous proinflammatory cytokines such as tumor necrosis factor  $\alpha$ , interferons, granulocyte colony-stimulating factor, thrombopoietin, IL-6, transforming growth factor  $\beta$  (TGF- $\beta$ ), IL-8, IL-1, and others have been shown to be overexpressed in different human sample-based analyses.<sup>6,8,9</sup> In fact, certain inflammatory mediators such as IL-1RAP, IL-8, IL-6, tumor necrosis factor  $\alpha$ , and IL-1 $\beta$  have been shown to directly support the growth of aberrant MDS stem cells in preclinical models.<sup>6,7,10-12</sup> We discuss some of the important pathologic inflammatory pathways in MDS and their current therapeutic targeting strategies.

### Role of the TGF- $\beta$ pathway in MDS

The TGF- $\beta$  superfamily contains numerous growth factors that regulate hematopoietic stem cell (HSC) proliferation and differentiation. TGF- $\beta$  signaling is mediated by a regulatory circuit of inhibitory and activating SMAD proteins that can inhibit the proliferation of HSCs while increasing erythroid differentiation, altogether leading to dysplastic erythropoiesis and reduced erythroid output with anemia phenotypes (Figure 1).<sup>13-15</sup>

The binding of various ligands, such as TGF- $\beta$ , activins, GDF11, and GDF8, lead to activation and phosphorylation of

activin-like kinase-containing receptors, which, in turn, activate a regulatory circuit of SMAD proteins.<sup>14,16,17</sup> SMADs 2/3 are phosphorylated by TGF- $\beta$  and GDF8/11 ligands, and these phosphorylated SMAD proteins act as transcription factors that can regulate important cell cycle and differentiation genes, leading to altered and dysplastic hematopoiesis. SMAD2/3 activation has been seen in preclinical models of MDS as well as in primary bone marrow samples.<sup>18,19</sup> Reduced levels of endogenous inhibitors (SMAD7 and SKI) and altered levels of microRNAs have been shown to contribute to enhanced downstream activation of the TGF- $\beta$  pathway and suppression of hematopoiesis.<sup>18-21</sup> Furthermore, patients with MDS have been shown to have higher levels of activins and GDF11 compared with healthy controls. In a mouse model of MDS, increased GDF11 levels were associated with erythroid hyperplasia and inefficient erythropoiesis.<sup>22</sup>

### Ligand trap luspaterecept is approved for the treatment of anemia in MDS

Luspatercept is a recombinant fusion protein derived from human activin receptor type IIb linked to a portion of immunoglobulin G. It is approved for the treatment of adults with transfusion-dependent anemia due to very low-, low-, and intermediate-risk MDS with RSs who had an unsatisfactory response to or are ineligible for erythropoietin-based therapy. Luspatercept can bind various TGF- $\beta$  superfamily ligands, including GDF8, GDF11, and

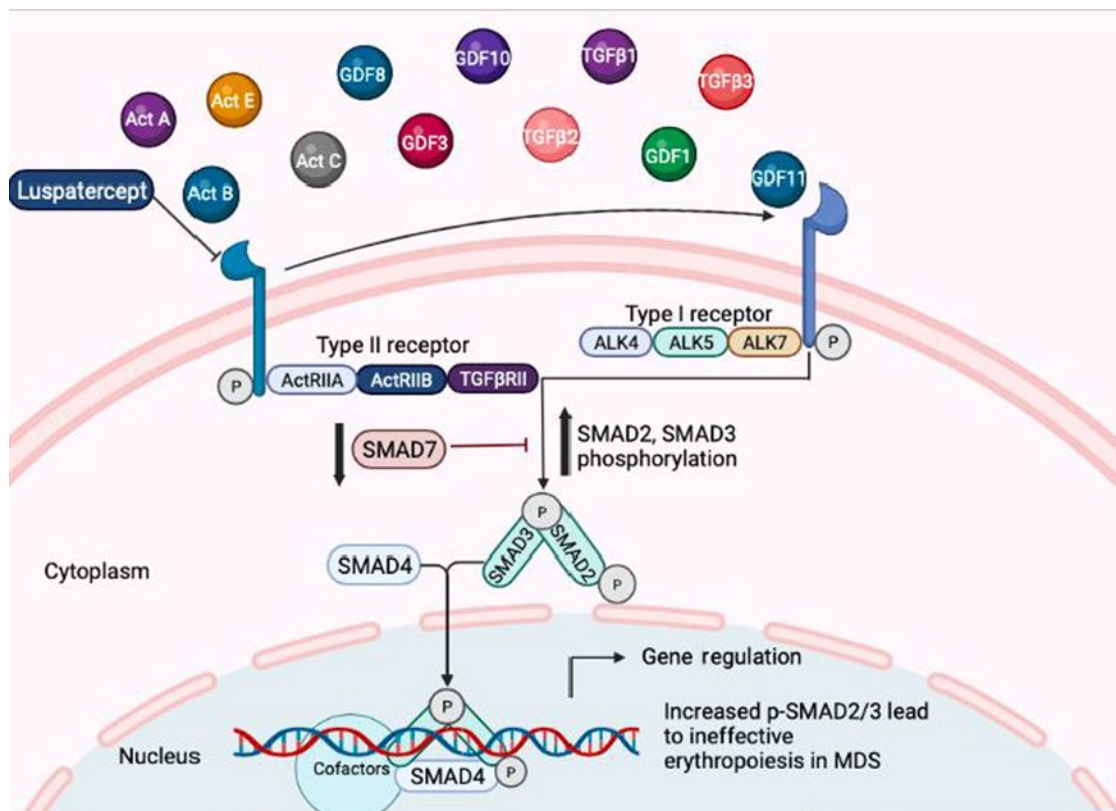

**Figure 1. TGF- $\beta$  pathways in MDS: Various ligands belonging to the TGF- $\beta$  pathway bind to activin-like kinase (ALK) receptors and activate SMAD proteins. SMAD proteins act as transcription factors and regulate important hematopoietic genes that are altered in MDS. ActRIIA, activin receptor type IIA; ActRIIB, ActRIIB.**

activin B, enhancing late-stage erythropoiesis by decreasing SMAD2/3 activation and signaling.<sup>14</sup> In mouse models of MDS and  $\beta$ -thalassemia, luspatercept decreased SMAD2/3 phosphorylation, reduced erythroid hyperplasia, enhanced erythroid maturation, and increased hemoglobin levels.<sup>22,23</sup>

Luspatercept was evaluated in an open-label phase 2 trial that included 58 anemic patients with low-risk (LR)-MDS (PACE-MDS) and resulted in erythroid hematologic improvement in 38% of patients. Responses were higher in patients with spliceosome mutations (*SF3B1*, *SRSF2*, *U2AF1*, and *ZRSR2*) and with  $\geq 15\%$  ringed sideroblasts. Treatment was well tolerated, with only 3 grade 3 treatment-related adverse events (1 case of myalgia, 1 of increased blast cell count, and 1 case of general physical health deterioration).<sup>24</sup> These results led to the phase 3 MEDALIST trial, which resulted in the approval of luspatercept by the US Food and Drug Administration in April 2020 and the European Medicines Agency in June 2020 for the treatment of anemia in adults with LR-MDS-RS or MDS/myeloproliferative neoplasm with ring sideroblasts and thrombocytosis requiring  $\geq 2$  red blood cell (RBC) units/8 weeks after erythropoiesis-stimulating agent (ESA) failure. This was a double-blind, placebo-controlled trial in which 229 anemic, lower-risk, nondel(5q) patients with  $\geq 15\%$  RSs or  $\geq 5\%$  RSs with *SF3B1* mutation received luspatercept or placebo. Patients were resistant to ESA (or had elevated serum erythropoietin levels at baseline). Patients treated with luspatercept had 38% RBC-transfusion-independence for  $>8$  weeks compared with 13% in the placebo group ( $P < .0001$ ), with a median duration of RBC-transfusion-independence of 30.6 weeks in the luspatercept arm. Adverse events were similar to the previously reported trial.<sup>25</sup> There are several ongoing clinical trials evaluating luspatercept in non-RS MDS as well as in combination with other agents (Table 1).

## CLINICAL CASE 2

A 73-year-old woman with a history of hypertension, diabetes, and previously diagnosed low-risk MDS was referred to our clinic for a second opinion after 7 months of treatment with ESA for symptomatic anemia, with an initial response leading to transfusion independence, but now with loss of response. A CBC revealed a WBC count of  $3.5 \times 10^9/\mu\text{L}$ , with an ANC of  $2.0 \times 10^9/\mu\text{L}$ , Hgb of 6.0 g/ $\mu\text{L}$ , and a platelet count of 90 K/ $\mu\text{L}$ . A BM biopsy was performed, showing a hypercellular marrow (70%-80% cellularity), with marked dysplastic changes in 30% of erythroid cells and 2% of blasts; cytogenetics was normal. NGS identified a *U2AF1* S34F mutation with 19% VAF, confirming the diagnosis of LR-MDS.

## Spliceosome mutations in MDS can lead to inflammation

Mutations in RNA splicing genes are commonly seen in MDS, accounting for 40% to 65% of cases. Commonly mutated genes include *SF3B1* (20%-25%), *SRSF2* (12%), *U2AF1* (10%), and *ZRSR2* (2%-6%).<sup>26</sup>

The posttranslational process of removing introns and ligating exons to generate mature transcripts appropriate for translation is known as pre-messenger RNA splicing. Before a transcript can be exported to the cytoplasm for translation, introns must be removed, a process carried out by the spliceosome. Dysregulated pre-messenger RNA splicing may result in functional alterations in the translated protein, possibly resulting in the creation of oncogenes or the inactivation of tumor suppressor genes. Various studies have shown that misspliced versions of numerous important genes can be seen in primary patient samples and in spliceosome mutant MDS models. A few of these

**Table 1. Selected trials targeting inflammation in MDS and CH**

| Class                                                           | Agent                                           | Trial name    | Phase | Population                                                | Status             | Identifier  |
|-----------------------------------------------------------------|-------------------------------------------------|---------------|-------|-----------------------------------------------------------|--------------------|-------------|
| TGF- $\beta$ pathway                                            | Luspatercept                                    | PACE-MDS (24) | 2     | LR-MDS                                                    | Completed          | NCT01749514 |
| TGF- $\beta$ pathway                                            | Luspatercept vs placebo                         | MEDALIST (25) | 3     | LR-MDS-RS                                                 | Completed          | NCT02631070 |
| TGF- $\beta$ pathway                                            | Luspatercept vs epoetin alfa                    | COMMANDS      | 3     | LR-MDS                                                    | Recruiting         | NCT03682536 |
| TGF- $\beta$ pathway                                            | Luspatercept + lenalidomide                     | —             | 1/2   | LR-MDS                                                    | Recruiting         | NCT04539236 |
| TGF- $\beta$ pathway                                            | Galunisertib                                    | —             | 2     | LR-MDS                                                    | Completed          | NCT02008318 |
| TGF- $\beta$ pathway                                            | Vactosertib                                     | —             | 1/2   | LR-MDS                                                    | Completed          | NCT03074006 |
| TIM-3 pathway<br>TGF- $\beta$ pathway<br>IL-1 $\beta$ inhibitor | Sabatolimab<br>NIS793<br>Canakinumab            | —             | 1b    | LR-MDS                                                    | Recruiting         | NCT04810611 |
| IL-1 $\beta$ inhibitor                                          | Canakinumab                                     | —             | 2     | LR-MDS or MDS/MPN                                         | Recruiting         | NCT05237713 |
| IL-8 inhibitor                                                  | BMS-986253 $\pm$ PO decitabine and cedazuridine | —             | 1/2   | HR-MDS with prior HMA therapy or LR-MDS with cytopenias   | Not yet Recruiting | NCT05148234 |
| CXCR1 and CXCR2 inhibitor                                       | SX-682                                          | —             | 1     | MDS with disease progression or prior therapy intolerance | Recruiting         | NCT04245397 |
| TLR2 inhibitor                                                  | Tomaralimab                                     | —             | 1/2   | LR-MDS with prior HMA                                     | Completed          | NCT02363491 |
| IRAK4 inhibitor                                                 | Emavusertib (CA-4948)                           | CURIS         | 1     | HR-MDS and AML                                            | Active             | NCT04278768 |
| IRAK4 inhibitor                                                 | Emavusertib (CA-4948)                           | LUCAS         | 2     | LR-MDS                                                    | Recruiting         | NCT05178342 |

AML, acute myelogenous leukemia; HMA, hypomethylating agent; MPN, myeloproliferative neoplasms; TBD, to be determined; TLR2, Toll-like receptor 2.

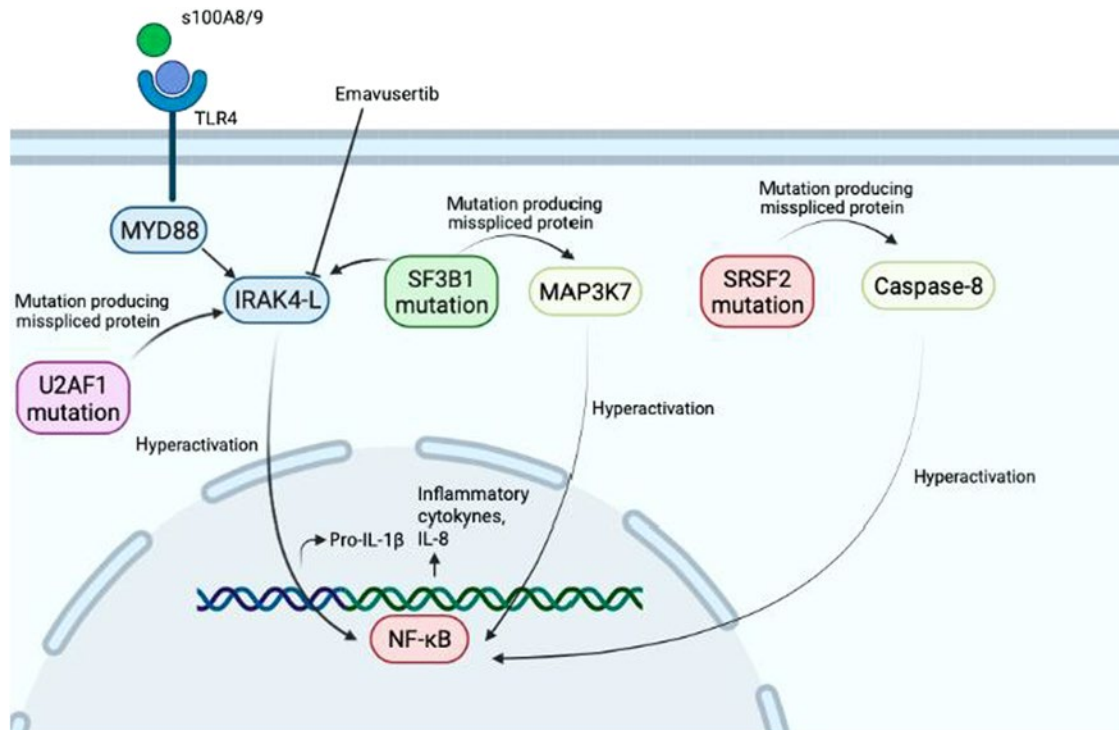

**Figure 2. Spliceosome mutations and inflammation in MDS: Mutations in splicing genes can lead to expression of isoforms that lead to maximal activation of proinflammatory NF-κB-driven pathways in MDS.**

misspliced genes include *MAP3K7*, *CASP8*, *GNAS*, and *IRAK4*, all of which can activate the proinflammatory nuclear factor κB (NF-κB) and other proliferative pathways (Figure 2).<sup>27-30</sup> Recent data show that loss of function of the helicase *DDX41*, a gene that is germline mutated in MDS, can also lead to increased RNA: DNA hybrids and activates the inflammatory cGAS-STING pathway.<sup>31</sup>

Interleukin 1 receptor-associated kinase 4 (*IRAK4*) is an important component of the innate immune signaling cascade that is activated by the MyD88 adapter protein downstream of Toll-like receptors. This in turn results in stimulation of NF-κB, prompting inflammatory responses, oncogenesis, and survival of malignant cells.<sup>12</sup> *IRAK4* can exist in longer and shorter isoforms, and *U2AF1* and *SF3B1* mutations can lead to altered exon inclusion, leading to preferential production of a longer isoform (*IRAK4-L*). This longer isoform contains an N-terminal death domain and C-terminal kinase domain that assemble stochastically with the Myddosome complex, resulting in maximal activation of innate immune signaling pathways.<sup>30</sup> Preclinical studies have shown that inhibition of *IRAK4-L* by pharmacologic and genetic means can suppress leukemic proliferation both in vitro and in vivo. Thus, *U2AF1* and *SF3B1* mutations induce the expression of therapeutically targetable active *IRAK4* isoforms and establish a link between a mutation and chronic innate immune signaling activation in MDS.<sup>30</sup> Clinical trials are now evaluating the efficacy of *IRAK4* inhibitors in MDS (Table 1).

### CLINICAL CASE 3

A 55-year-old man with a history of iron-deficiency anemia was initially referred to our clinic in 2007 for iron-deficiency anemia

secondary to a duodenal ulcer that had been diagnosed when he presented to the hospital with Hgb of 5.8 g/μL, mean corpuscular volume of 68 fL, ferritin of 4 ng/mL, iron of 15 μg/dL, saturation of 5%, and total iron-binding capacity of 515 μg/dL. He was started on proton pump inhibitors, and his Hgb recovered to 13 g/μL; at the time, a peripheral blood NGS panel had been obtained, which had revealed a *TET2* mutation (VAF of 12%). He is a nonsmoker who resides in New York City with his wife and worked as a firefighter during the World Trade Center (WTC) terrorist attacks. He was referred again to our clinic for worsening exertional dyspnea; his current CBC shows a WBC count of 3.7×10<sup>9</sup>/μL, with an ANC of 2.2×10<sup>9</sup>/μL, Hgb of 6.4 g/μL, and a platelet count of 100 K/μL. A BM biopsy was performed, showing a hypercellular marrow (50%-60% cellularity), with dysplastic changes in 15% of erythroid cells and 2% blasts; cytogenetics was normal. NGS identified a *TET2* mutation with 22% VAF, and the evolution from clonal hematopoiesis (CH) to low-risk MDS was confirmed.

### Inflammation is associated with increased clonal hematopoiesis

CH is defined as the acquisition of somatic mutations in blood cells in individuals without a hematologic malignancy, dysplasia, or cytopenia. CH increases the risk of leukemia by 0.5% to 1.0% per year, and it is associated with higher morbidity and mortality from a variety of inflammatory conditions and atherosclerotic cardiovascular disease.<sup>32-34</sup> Furthermore, the development of CH is associated with smoking, increasing age, and exposure to genotoxic stimuli.<sup>35</sup> Aging is associated with the development of CH potentially caused by an increased inflammatory milieu seen

in the bone marrow.<sup>6-9,36</sup> Several proinflammatory cytokines are elevated in preclinical animal models of aging that are detrimental to normal HSCs and promote the growth of aberrant clones.

As illustrated in case 3, several exposures are associated with a higher risk of developing CH. First responders to the WTC 9/11 disaster were exposed to proinflammatory particulate matter containing high levels of potential carcinogens, and a recent study identified a significantly higher proportion of WTC-exposed first responders with CH (10%) vs non-WTC-exposed firefighters (6.7%;  $P=.0006$ ). The frequency of somatic mutations in WTC-exposed first responders showed an age-related increase and predominantly affected *DNMT3A*, *TET2*, and other CH-associated genes. Other studies have also shown that systemic inflammation can increase the size of the mutant clone in preclinical CH models and also potentially accelerate the transformation to overt cytopenias.<sup>6-9,36</sup>

CH mutations, especially in the *TET2* and *JAK2* genes, can by themselves lead to a proinflammatory state by making macrophages more proliferative and secretory.<sup>37,38</sup> Other myeloid-derived inflammatory mediators have also been shown to be elevated in MDS. S100A8/S100A9 are cytosolic alarmins predominantly secreted by myeloid cells, which activate the inflammasome via the Toll-like receptor 4 and NLRP3 pathways and are found to be elevated in MDS.<sup>39</sup> The binding of the S100A8/S100A9 heterodimer to the CD33 receptors on myeloid-derived suppressor cells also leads to their expansion, leading to MDS-like phenotypes in preclinical models.<sup>39</sup> S100A8/9 have also been shown to be associated with anemia seen in MDS with 5q deletions in preclinical models.<sup>40</sup> Based on these studies, inhibition of inflammasome signaling is emerging as a potential target in MDS and CH and is being investigated in trials (Table 1).

### MDS and autoimmunity

MDS and chronic myelomonocytic leukemia have been linked to autoimmune and inflammatory diseases such as polychondritis, vasculitis, and arthritis. Retrospective studies have postulated that more than 10% of patients with MDS may have concomitant autoimmune/inflammatory diseases with enrichment of *TET2*, *IDH*, and *SRSF2* mutations.<sup>41</sup> In fact, azacitidine has demonstrated efficacy in the treatment of autoimmune disorders associated with MDS/chronic myelomonocytic leukemia in small studies and suggests that further studies are warranted to test these associations.<sup>42</sup> Last, an inflammatory syndrome that can overlap with MDS, the VEXAS (vacuoles, E1 enzyme, x-linked, autoinflammatory, somatic) syndrome, has been recently described; it is characterized by an often fatal, treatment-refractory inflammatory disorder that develops in late adulthood. The syndrome is characterized by fevers, cytopenias, characteristic vacuoles in myeloid and erythroid precursor cells, dysplastic bone marrow, neutrophilic cutaneous and pulmonary inflammation, chondritis, and vasculitis. Most of these patients meet clinical criteria for an inflammatory syndrome or a hematologic disease (MDS or multiple myeloma) or both. These patients have mutations in more than 50% of their hematopoietic stem cells, including peripheral blood myeloid cells, and harbor mutations affecting p.Met41, resulting in the loss of the canonical cytoplasmic isoform of *UBA1* and in the expression of a novel, catalytically impaired isoform initiated at p.Met67. These mutant peripheral blood cells show decreased ubiquitylation and activated innate immune pathways.<sup>43</sup>

Taken together, these emerging data demonstrate the role of inflammation in perpetuating MDS pathobiology. It is hoped that strategies targeting specific inflammatory cascades will lead to improvements in cytopenias and decrease the risk of leukemia progression in MDS.

### Conflicts-of-interest disclosure

Amit Verma has received research funding from Prelude, BMS, GSK, Incyte, Medpacto, Curis, and Eli Lilly; is a scientific advisor for Stelexis, Bakx, Curis, Novartis, Acceleron and Celgene; receives honoraria from Stelexis and Janssen; and holds equity in Stelexis, Bakx, and Throws Exception.

Jesus D. Gonzalez-Lugo has no competing financial interests to declare.

### Off-label drug use

Jesus D. Gonzalez-Lugo: use of investigational agents in clinical trials is discussed.

Amit Verma: use of investigational agents in clinical trials is discussed.

### Correspondence

Amit Verma, Albert Einstein College of Medicine and Montefiore Medical Center, 1300 Morris Park Ave, Bronx, NY 10461; e-mail: amit.verma@einsteinmed.edu.

### References

1. Will B, Zhou L, Vogler TO, et al. Stem and progenitor cells in myelodysplastic syndromes show aberrant stage-specific expansion and harbor genetic and epigenetic alterations. *Blood*. 2012;120(10):2076-2086.
2. Pang WW, Pluvinaige JV, Price EA, et al. Hematopoietic stem cell and progenitor cell mechanisms in myelodysplastic syndromes. *Proc Natl Acad Sci USA*. 2013;110(8):3011-3016.
3. Woll PS, Kjällquist U, Chowdhury O, et al. Myelodysplastic syndromes are propagated by rare and distinct human cancer stem cells in vivo. *Cancer Cell*. 2014;25(6):794-808.
4. Shlush LI, Zandi S, Mitchell A, et al; HALT Pan-Leukemia Gene Panel Consortium. Identification of pre-leukaemic haematopoietic stem cells in acute leukaemia. *Nature*. 2014;506(7488):328-333.
5. Chen J, Kao Y-R, Sun D, et al. Myelodysplastic syndrome progression to acute myeloid leukemia at the stem cell level. *Nat Med*. 2019;25(1):103-110.
6. Caiado F, Pietras EM, Manz MG. Inflammation as a regulator of hematopoietic stem cell function in disease, aging, and clonal selection. *J Exp Med*. 2021;218(7):e20201541.
7. Hormaechea-Agulla D, Matatal KA, Le DT, et al. Chronic infection drives Dnm3a-loss-of-function clonal hematopoiesis via IFN $\gamma$  signaling. *Cell Stem Cell*. 2021;28(8):1428-1442.e61442e6.
8. Trowbridge JJ, Starczynowski DT. Innate immune pathways and inflammation in hematopoietic aging, clonal hematopoiesis, and MDS. *J Exp Med*. 2021;218(7):e20201544.
9. Zhang TY, Dutta R, Benard B, Zhao F, Yin R, Majeti R. IL-6 blockade reverses bone marrow failure induced by human acute myeloid leukemia. *Sci Transl Med*. 2020;12(538):eaax5104.
10. Schinke C, Giricz O, Li W, et al. IL8-CXCR2 pathway inhibition as a therapeutic strategy against MDS and AML stem cells. *Blood*. 2015;125(20):3144-3152.
11. Rhyasen GW, Bolanos L, Fang J, et al. Targeting IRAK1 as a therapeutic approach for myelodysplastic syndrome. *Cancer Cell*. 2013;24(1):90-104.
12. Barreyro L, Chlon TM, Starczynowski DT. Chronic immune response dysregulation in MDS pathogenesis. *Blood*. 2018;132(15):1553-1560.
13. Bewersdorf JP, Zeidan AM. Transforming growth factor (TGF)- $\beta$  pathway as a therapeutic target in lower risk myelodysplastic syndromes. *Leukemia*. 2019;33(6):1303-1312.
14. Verma A, Suragani RNVS, Aluri S, et al. Biological basis for efficacy of activin receptor ligand traps in myelodysplastic syndromes. *J Clin Invest*. 2020;130(2):582-589.
15. Di Giandomenico S, Kermani P, Mollé N, et al. Megakaryocyte TGF $\beta$ 1 partitions erythropoiesis into immature progenitor/stem cells and maturing precursors. *Blood*. 2020;136(9):1044-1054.

16. Blank U, Karlsson S. TGF- $\beta$  signaling in the control of hematopoietic stem cells. *Blood*. 2015;125(23):3542-3550.
17. Blank U, Karlsson S. The role of Smad signaling in hematopoiesis and trans-lational hematology. *Leukemia*. 2011;25(9):1379-1388.
18. Zhou L, McMahon C, Bhagat T, et al. Reduced SMAD7 leads to overactivation of TGF-beta signaling in MDS that can be reversed by a specific inhibitor of TGF-beta receptor I kinase. *Cancer Res*. 2011;71(3):955-963.
19. Zhou L, Nguyen AN, Sohal D, et al. Inhibition of the TGF-beta receptor I kinase promotes hematopoiesis in MDS. *Blood*. 2008;112(8):3434-3443.
20. Lam J, van den Bosch M, Wegryzn J, et al. miR-143/145 differentially regulate hematopoietic stem and progenitor activity through suppression of canonical TGF $\beta$  signaling. *Nat Commun*. 2018;9(1):2418.
21. Muench DE, Ferchen K, Velu CS, et al. SKI controls MDS-associated chronic TGF- $\beta$  signaling, aberrant splicing, and stem cell fitness. *Blood*. 2018;132(21):e24-e34.
22. Suragani RN, Cadena SM, Cawley SM, et al. Transforming growth factor- $\beta$  superfamily ligand trap ACE-536 corrects anemia by promoting late-stage erythropoiesis. *Nat Med*. 2014;20(4):408-414.
23. Suragani RN, Cawley SM, Li R, et al. Modified activin receptor IIB ligand trap mitigates ineffective erythropoiesis and disease complications in murine  $\beta$ -thalassemia. *Blood*. 2014;123(25):3864-3872.
24. Platzbecker U, Germing U, Götze KS, et al. Luspatercept for the treatment of anaemia in patients with lower-risk myelodysplastic syndromes (PACE-MDS): a multicentre, open-label phase 2 dose-finding study with long-term extension study. *Lancet Oncol*. 2017;18(10):1338-1347.
25. Fenaux P, Platzbecker U, Mufti GJ, et al. Luspatercept in patients with lower-risk myelodysplastic syndromes. *N Engl J Med*. 2020;382(2):140-151.
26. Yoshida K, Sanada M, Shiraishi Y, et al. Frequent pathway mutations of splicing machinery in myelodysplasia. *Nature*. 2011;478(7367):64-69.
27. Lee S-C, North K, Kim E, et al. Synthetic lethal and convergent biological effects of cancer-associated spliceosomal gene mutations. *Cancer Cell*. 2018;34(2):225-241.e8241e8.
28. Stanley RF, Abdel-Wahab O. Dysregulation and therapeutic targeting of RNA splicing in cancer. *Nat Cancer*. 2022;3(5):536-546.
29. Wheeler EC, Vora S, Mayer D, et al. Integrative RNA-omics discovers GNAS alternative splicing as a phenotypic driver of splicing factor-mutant neoplasms. *Cancer Discov*. 2022;12(3):836-855.
30. Smith MA, Choudhary GS, Pellagatti A, et al. U2AF1 mutations induce oncogenic IRAK4 isoforms and activate innate immune pathways in myeloid malignancies. *Nat Cell Biol*. 2019;21(5):640-650.
31. Weinreb JT, Gupta V, Sharvit E, Weil R, Bowman TV. Ddx41 inhibition of DNA damage signaling permits erythroid progenitor expansion in zebrafish. *Haematologica*. 2022;107(3):644-654.
32. Jaiswal S, Natarajan P, Silver AJ, et al. Clonal hematopoiesis and risk of atherosclerotic cardiovascular disease. *N Engl J Med*. 2017;377(2):111-121.
33. Genovese G, Jaiswal S, Ebert BL, McCarrroll SA. Clonal hematopoiesis and blood-cancer risk. *N Engl J Med*. 2015;372(11):1071-1072.
34. Jaiswal S, Fontanillas P, Flannick J, et al. Age-related clonal hematopoiesis associated with adverse outcomes. *N Engl J Med*. 2014;371(26):2488-2498.
35. Coombs CC, Zehir A, Devlin SM, et al. Therapy-related clonal hematopoiesis in patients with non-hematologic cancers is common and associated with adverse clinical outcomes. *Cell Stem Cell*. 2017;21(3):374-382.e4382e4.
36. Avagyan S, Henninger JE, Mannherz WP, et al. Resistance to inflammation underlies enhanced fitness in clonal hematopoiesis. *Science*. 2021;374(6568):768-772.
37. Fidler TP, Xue C, Yalcinkaya M, et al. The AIM2 inflammasome exacerbates atherosclerosis in clonal haematopoiesis. *Nature*. 2021;592(7853):296-301.
38. Fuster JJ, MacLauchlan S, Zuriaga MA, et al. Clonal hematopoiesis associated with TET2 deficiency accelerates atherosclerosis development in mice. *Science*. 2017;355(6327):842-847.
39. Sallman DA, List A. The central role of inflammatory signaling in the pathogenesis of myelodysplastic syndromes. *Blood*. 2019;133(10):1039-1048.
40. Schneider RK, Schenone M, Ferreira MV, et al. Rps14 haploinsufficiency causes a block in erythroid differentiation mediated by S100A8 and S100A9. *Nat Med*. 2016;22(3):288-297.
41. Zhao L-P, Boy M, Azoulay C, et al. Genomic landscape of MDS/CMML associated with systemic inflammatory and autoimmune disease. *Leukemia*. 2021;35(9):2720-2724.
42. Fraison J-B, Mekinian A, Grignano E, et al. Efficacy of Azacitidine in autoimmune and inflammatory disorders associated with myelodysplastic syndromes and chronic myelomonocytic leukemia. *Leuk Res*. 2016;43:13-17.
43. Beck DB, Ferrada MA, Sikora KA, et al. Somatic mutations in UBA1 and severe adult-onset autoinflammatory disease. *N Engl J Med*. 2020;383(27):2628-2638.

---

© 2022 by The American Society of Hematology  
DOI 10.1182/hematology.2022000350
